# Supplementary material for: Co2P2O7 Microplate/Bacterial Cellulose–Derived Carbon Nanofiber Composites with Enhanced Electrochemical Performance
Source: MDPI journal article supplement (doi:10.3390/nano11082015), 2021-08-06
Supplement: s1 [file s1]

# Co<sub>2</sub>P<sub>2</sub>O<sub>7</sub> Microplate/Bacterial Cellulose–Derived Carbon Nanofiber Composites with Enhanced Electrochemical Performance

Likkhasit Wannasen <sup>1</sup>, Wiyada Mongkolthanaruk <sup>2</sup>, Ekaphan Swatsitang <sup>1</sup>, Prasert Pavasant <sup>3</sup> and Supree Pinitsoontorn <sup>1,\*</sup>

<sup>1</sup> Institute of Nanomaterials Research and Innovation for Energy (IN–RIE), Department of Physics, Faculty of Science, Khon Kaen University, Khon Kaen 40002, Thailand; likkhasit123@hotmail.co.th (L.W.); ekaphan@kku.ac.th (E.S.)

<sup>2</sup> Department of Microbiology, Faculty of Science, Khon Kaen University, Khon Kaen 40002, Thailand; wiymon@kku.ac.th

<sup>3</sup> Thai Roong Ruang Sugar Group, Bangkok 10120, Thailand; supersert@gmail.com

\* Correspondence: psupree@kku.ac.th; Tel.: +66–43–203–166; Fax: +66–43–202–374

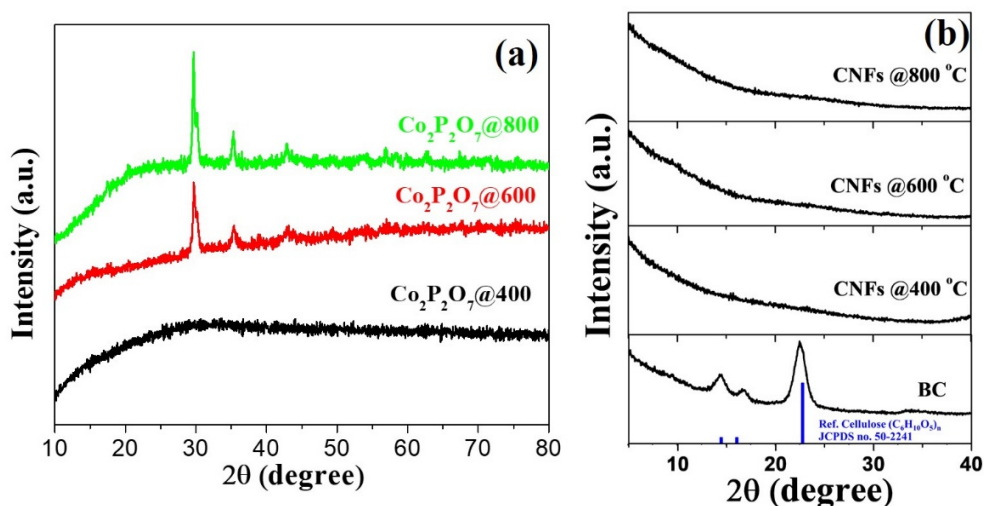

**Figure S1** XRD patterns of (a) Co<sub>2</sub>P<sub>2</sub>O<sub>7</sub>@400, Co<sub>2</sub>P<sub>2</sub>O<sub>7</sub>@600 and Co<sub>2</sub>P<sub>2</sub>O<sub>7</sub>@800 and (b) BC, CNFs@400, CNFs@600 and CNFs@800 with compared to the references for cellulose.

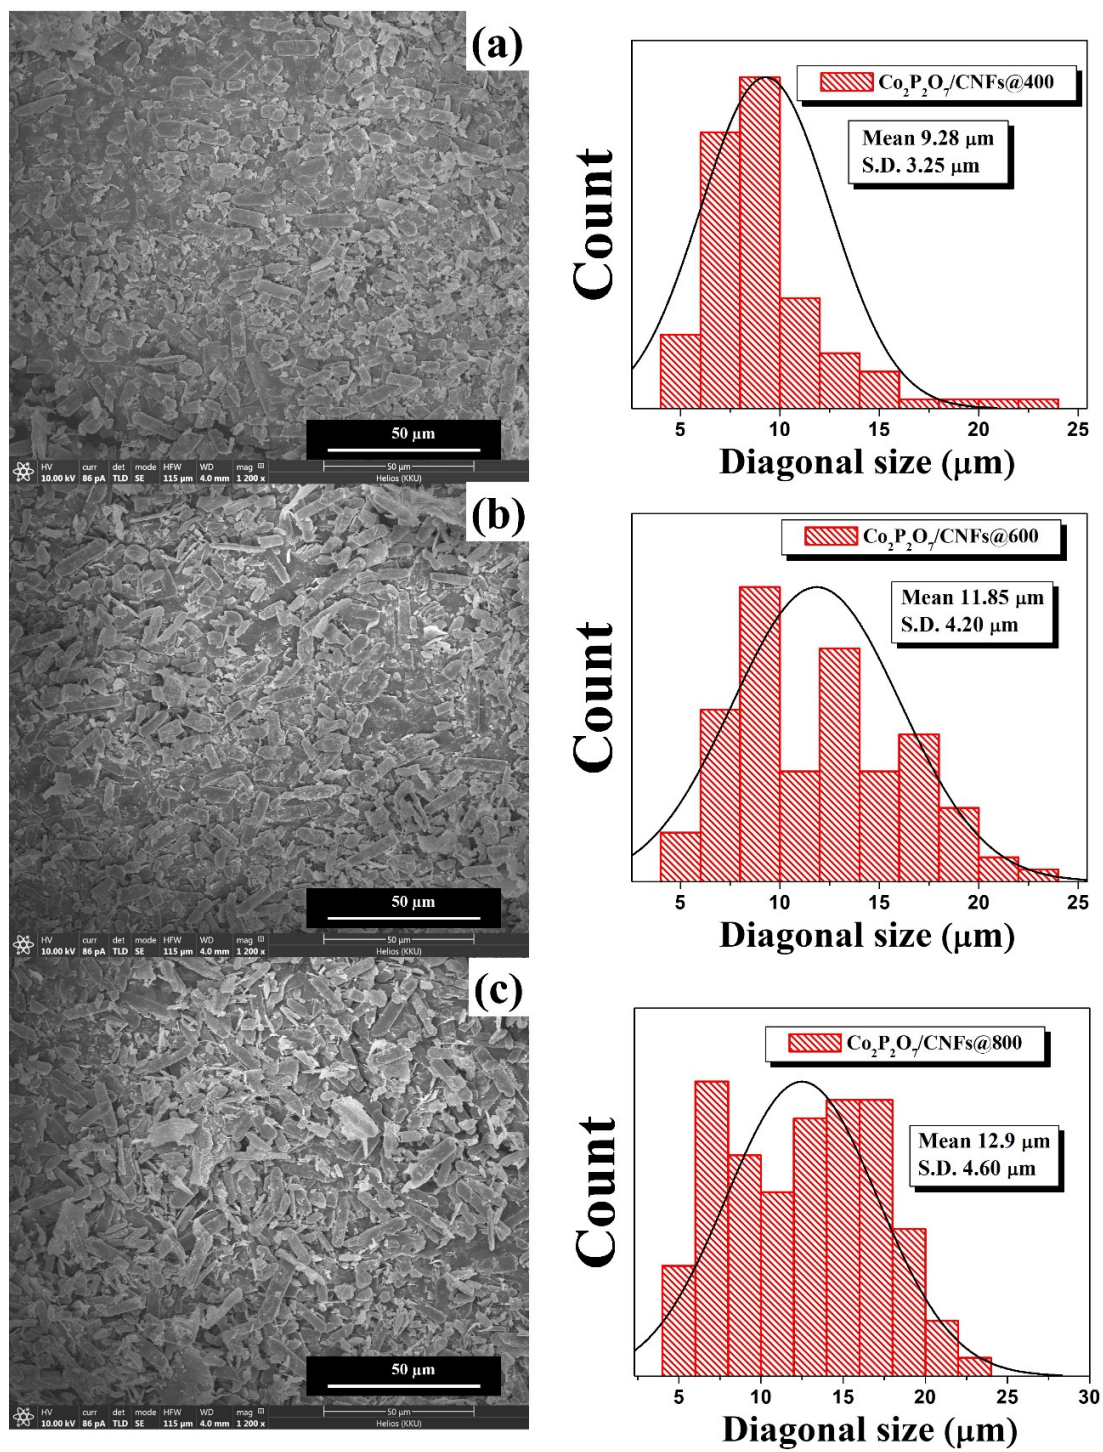

**Figure S2** FE-SEM images with histograms of diagonal size distribution of (a)  $\text{Co}_2\text{P}_2\text{O}_7/\text{CNFs}@400$ , (b)  $\text{Co}_2\text{P}_2\text{O}_7/\text{CNFs}@600$  and (c)  $\text{Co}_2\text{P}_2\text{O}_7/\text{CNFs}@800$ .

**Table S1** Values of fitting parameters obtained from the EIS analysis.

| Parameters                | Co <sub>2</sub> P <sub>2</sub> O <sub>7</sub> /CNFs@400 | Co <sub>2</sub> P <sub>2</sub> O <sub>7</sub> /CNFs@600 | Co <sub>2</sub> P <sub>2</sub> O <sub>7</sub> /CNFs@800 |
|---------------------------|---------------------------------------------------------|---------------------------------------------------------|---------------------------------------------------------|
| <b>R<sub>s</sub> (Ω)</b>  | 1.6378±0.67%                                            | 1.4536± 0.69%                                           | 1.274±0.56%                                             |
| <b>CPE1-T</b>             | 0.064873±2.38%                                          | 0.16174±1.28%                                           | 0.18619±0.90%                                           |
| <b>CPE1-P</b>             | 0.67669±0.85%                                           | 0.52697±0.85%                                           | 0.61347±0.53%                                           |
| <b>R<sub>ct</sub> (Ω)</b> | 7.5071±3.96%                                            | 6.6023±4.27%                                            | 4.3573±1.98%                                            |
| <b>Wo1-R</b>              | 15.174±1.83%                                            | 14.184±2.38%                                            | 13.986±1.60%                                            |
| <b>Wo1-T</b>              | 2.7811±4.10%                                            | 2.6875±6.75%                                            | 2.5714±1.41%                                            |
| <b>Wo1-P</b>              | 0.45138±1.20%                                           | 0.55703±1.23%                                           | 0.56201±0.67%                                           |
